# Supplementary material for: Isolation and identification of serotonin compound from banana hump: a reproductive stimulant for tiger shrimp Penaeus monodon broodstock enhancement
Source: PeerJ. 2024 Dec 13;12:e18670. doi: 10.7717/peerj.18670 (PMC11648693; doi:10.7717/peerj.18670)
Supplement: Supplemental Information 1 — Higher values indicate better reproductive performance of the tiger shrimp broodstock. The data were statistically analyzed to identify the effect of serotonin administration on the reproductive performance of the black tiger shrimp broodstock. [file peerj-12-18670-s001.xlsx]

## Sheet: Molting
Individual molting per week
A) Female
Treatmen	Week
(n=10)	1	2	3	4	5	6	7	8	Average	SD
Serotonin (SE)	0	1	2	0	1	0	1	3	1	1.06904
Control (CT)	1	1	1	1	1	1	0	1	0.875	0.353553
B) Male
Treatmen	Week
(n=10)	1	2	3	4	5	6	7	8	Average	SD
Serotonin (SE)	1	3	1	0	3	0	0	0	1	1.30931
Control (CT)	1	1	1	0	1	1	1	0	0.75	0.46291
C) Total (Female+Male)
Treatmen	Week
(n=10)	1	2	3	4	5	6	7	8	Average	SD
Serotonin (SE)	1	4	3	0	4	0	1	3	2	1.69031
Control (CT)	2	2	2	1	2	2	1	1	1.625	0.517549
Cumulative individual molting per week
Treatmen	Week
(n=10)	1	2	3	4	5	6	7	8
Serotonin (SE)	1	5	8	8	12	12	13	16
Control (CT)	2	4	6	7	9	11	13	14
Cumulative molting percentage (%)
Treatmen	Week
(n=10)	1	2	3	4	5	6	7	8
Serotonin (SE)	10	50	80	80	120	120	130	160
Control (CT)	20	40	60	70	90	110	130	140

## Sheet: Egg Number
Spawning tiger shrimp broodstock
Female	Treatmen	No. Taq	Number	Percentage	Total Eggs*	Remarks
(n=5)
	Serotonin (SE)	No.1	3	60	259760
		No,2			340130
		No.5			259760
		Average			286550
		SD			46401.6
	Control (CT)	No.16	2	40	171670
		No.17			125500
		Average			148585
		SD			32647.1
The 1st re-maturation
Female	Treatmen	No. Taq	Number	Percentage	Total Eggs*	Remarks
(n=5)
	Serotonin (SE)	No.1	1	20	270900
		Average			270900
		SD			0
	Control (CT)	No Data
The 2nd re-maturation
Female	Treatmen	No. Taq	Number	Percentage	Total Eggs*	Remarks
(n=5)
	Serotonin (SE)	No.1	1	20	125600
		Average			125600
		SD			0
	Control (CT)	No Data
*) Sampling on three replicates

## Sheet: Egg diameter
Spawing tiger shrimp broodstock
							Seretonin (egg diameter)				Control (egg diameter)			Seretonin (egg diameter)
Female	Treatmen	No. Taq	Egg diameter*	Average/SD			N0.1	N0,2	No.5		No.16	No. 17		The 1st	The 2nd
(n=5)	Serotonin (SE)	No.1	270.6				275.45	294.6	264		265.55	268.95		No.1	No.1
		No,2	285.1				267.5	290.5	262.75		267.65	285.375		264.85	281.6
		No.5	270.6				261.35	291.65	272.8		257.5	281.2		265.75	282.5
		Average		275.433			268.85	289.5	277.45		269.2	281.125		264	286
		SD		8.37158			266.65	273.3	268.4		271.45	272.65		264.85	273.7
							269.2	286.9	286.4		276.45	274.475		257.7	274.55
	Control (CT)	No.16	270.613				266.55	293.05	271.9		275.3	281.75		257	275.45
		No.17	278.683				252.65	293.9	264		278	279.325		253.45	276.2
		Average		274.648			259.15	294.6	268.4		250.15	282.725		248.8	290.5
		SD		6.1			266.05	316.3	271.05		254.65	276.25		255.8	294.6
							288.1	293.05	263.1		261.35	279.875		256.35	295.7
							270.15	273.7	275.45		275.05	290.65		256.35	299.2
The 1st re-maturation							280.75	276.2	255.2		277.55	281.425		258.75	295.3
	Treatmen	No. Taq					277	276.3	272.8		268.85	275.825		250.8	291.65
Female	Serotonin (SE)	No.1	259.1				277.2	275.45	277.2		276.2	276.325		261.35	293.05
(n=5)		Average		259.1			279.85	275.8	278.95		278.1	281		271.9	293.05
		SD		5.7			276.3	272.2			279.1	281.625		258.45	293.9
							267.55	286			281.75	272.875		259.6	273.3
	Control (CT)	No Data						267.9			277.5	274.067		258.75	294.6
								288.65				280.95			267.9
								282.5				273.9			272.2
								272.8							272.8
								295.7							286.9
The 2nd re-maturation	Treatmen	No. Taq						281.6							288.65
	Serotonin (SE)	No.1	285.1												289.5
Female		Average		285.1		Average	270.572	285.09	270.616		270.597	278.683		259.139	285.117
(n=5)		SD		9.5
	Control (CT)	No Data

## Sheet: Spermatozoa
Spermatofore, spematozoa of male tiger shrimp
	Treatmen	Broodstock	Spermatofore suc	Weight (g)	Spermatozoa number (10^6 cells)	Normal spermatozoa (%)
	SE	1	2	0.05	31.86	43.1
		2	2	0.07	34.75	30
		Average	2	0.06	33.305	36.55
		SD	0	0.0141421	2.04354	9.2631
	CT	1	2	0.05	11.68	31.8
		2	2	0.04	12.38	9.8
		Average	2	0.045	12.03	20.8
		SD	0	0.00707107	0.494975	15.5563
